# Supplementary material
Source: MDPI journal article supplement (https://www.mdpi.com/1424-2818/16/5/283)
Supplement: s1 [file s1]

**Table S3.** The regression models showing the relationship between number of lost pet birds and average selling price, number of pet shops, human population size, and surface area. Asterisk indicate provinces with significant relationships. GP = Gauteng Province, KZN = KwaZulu-Natal, and WC= Western Cape.

| <b>Model 1</b>                                                                                      | <b>Estimates (<math>\beta</math>)</b> | <b>Std. Error</b> | <b>t-value</b> | <b>P-value</b> |
|-----------------------------------------------------------------------------------------------------|---------------------------------------|-------------------|----------------|----------------|
| Number of lost species ~ price                                                                      | 1.52                                  | 0.54              | 2.79           | <0.01          |
| Number of lost species ~ number of pet shops                                                        | 0.34                                  | 0.15              | 2.21           | 0.02           |
| Number of lost species ~ human population size                                                      | 0.35                                  | 0.20              | 1.78           | 0.05           |
| Number of lost species ~ surface area                                                               | -1.38                                 | 1.52              | -0.91          | 0.36           |
| Number of lost species ~ number of pet shops + human population size + province (* GP, KZN, and WC) | 1.4                                   | 0.18              | 3.8            | <0.01          |
| <b>Model 2</b>                                                                                      | <b>Estimates (<math>\beta</math>)</b> | <b>Std. Error</b> | <b>t-value</b> | <b>P-value</b> |
| Number of lost species ~ Colour (*Not colourful)                                                    | -2.59                                 | 0.41              | 6.35           | 0.42           |
| Number of lost species ~ Size (*Small)                                                              | 1.59                                  | 0.16              | 10.04          | <0.01          |
| Number of lost species ~ Size (*Medium)                                                             | 2.97                                  | 0.32              | 9.2            | <0.01          |
| Number of lost species ~ Docility (* Not docile)                                                    | 1.45                                  | 0.28              | 5.2            | <0.01          |

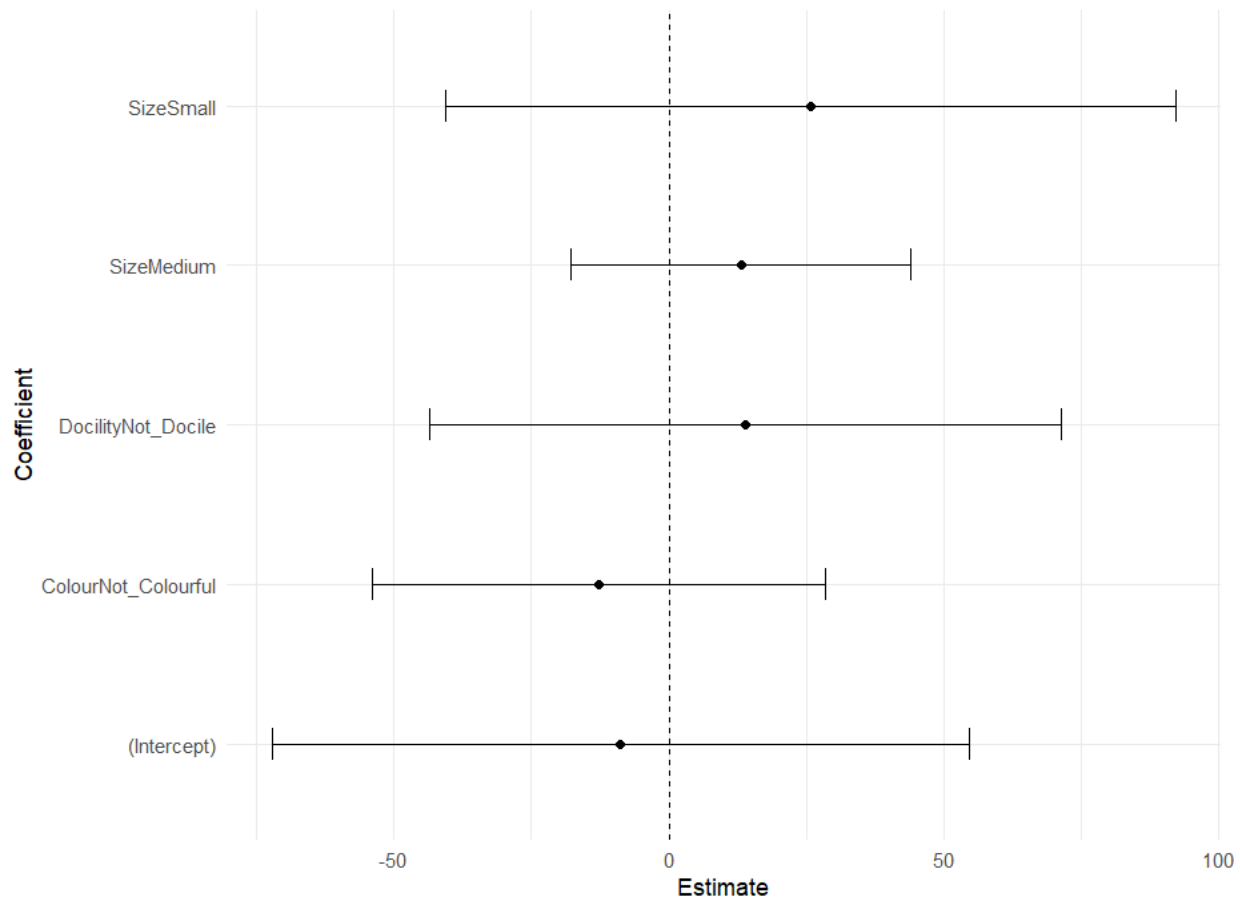

**Figure S1:** A coefficient plot showing the logistic regression model estimates of factors affecting lost pet birds in South Africa. Positive estimates indicate a relationship.
